# Supplementary material
Source: ML conference proceedings conference paper supplement (https://proceedings.neurips.cc/paper_files/paper/2013/hash/5a4b25aaed25c2ee1b74de72dc03c14e-Abstract.html)
Supplement: Supplementary file [file 5a4b25aaed25c2ee1b74de72dc03c14e-Supplemental.zip]

## Appendix

Recall that we are interested in the minimization

$$\begin{aligned} \min_{B,D} \quad & \|A - B\|_F \\ \text{s.t.} \quad & \|D\|_2 \leq c \\ & Z_{ij} D_{ij} = 0 \\ & D = |B|. \end{aligned} \tag{9}$$

**Lemma 9.** *If we define  $R = |A|$ , this is equivalent to the minimization*

$$\begin{aligned} \min_D \quad & \|R - D\|_F \\ \text{s.t.} \quad & \|D\|_2 \leq c \\ & Z_{ij} D_{ij} = 0 \\ & D \geq 0 \end{aligned} \tag{10}$$

*Proof.* For fixed  $D$ , the minimum  $B$  will always be achieved by  $B = D \odot \text{sign}(A)$ , meaning  $\|A - B\|_F = \|A - D \odot \text{sign}(A)\|_F = \|R - D\|_F$ .  $\square$

To actually project the parameters  $A = (\beta_{ij})$  corresponding to an Ising model, one first takes the absolute value  $R = |A|$ , and passes it as input to this minimization. After finding the minimizing argument, the new parameters are  $B = D \odot \text{sign}(A)$ .

**Theorem 10.** *Define  $R = |A|$ . The minimization in Eq. 10 is equivalent to the problem of  $\max_{M \geq 0, \Lambda} g(\Lambda, M)$ , where the objective and gradient of  $g$  are, for  $D(\Lambda, M) = \Pi_c[R + M - \Lambda \odot Z]$ ,*

$$g(\Lambda, M) = \frac{1}{2} \|D(\Lambda, M) - R\|_F^2 + \Lambda \cdot Z \cdot D(\Lambda, M) \tag{11}$$

$$\frac{dg}{d\Lambda} = Z \odot D(\Lambda, M) \tag{12}$$

$$\frac{dg}{dM} = D(\Lambda, M). \tag{13}$$

*Proof.* The minimization in Eq. 10 has the Lagrangian

$$\mathcal{L}(D, \Lambda, M) = \frac{1}{2} \|D - R\|_F^2 + I[\|D\|_2 \leq c] + \Lambda \cdot Z \cdot D - M \cdot D, \tag{14}$$

where  $I$  is an indicator function returning  $\infty$  if  $\|D\|_2 > c$  and zero otherwise,  $\Lambda$  is a matrix of Lagrange multipliers enforcing that  $Z_{ij} D_{ij} = 0$ , and  $M$  is a matrix of Lagrange multipliers enforcing that  $D \geq 0$ .

Standard duality theory states that Eq. 10 is equivalent to the saddle-point problem  $\max_{M \geq 0, \Lambda} \min_D \mathcal{L}(D, \Lambda, M)$ . So, we are interested in evaluating  $g(\Lambda, M) = \min_D \mathcal{L}(D, \Lambda, M)$  for fixed  $\Lambda$  and  $M$ . Some algebra gives

$$\begin{aligned} \arg \min_D \mathcal{L}(D, \Lambda, M) \\ &= \arg \min_D \frac{1}{2} \|D - R\|_F^2 + \Lambda \cdot Z \cdot D + I[\|D\|_2 \leq c] - M \cdot D \\ &= \arg \min_D \frac{1}{2} \|D - (R + M - \Lambda \odot Z)\|_F^2 + I[\|D\|_2 \leq c], \end{aligned}$$

which shows that  $g$  can be calculated as in Eq. 11.

Next, we are interested in the gradient of  $g$ . By applying Danskin's theorem to Eq. 14, we have that  $\frac{d}{dM} \arg \min_D \mathcal{L}(D, \Lambda, M)$  will be exactly  $D$  where  $D$  is the minimizer of Eq. 14. This establishes Eq. 13. Similarly, it can be shown that  $\frac{d}{d\Lambda} \arg \min_D \mathcal{L}(D, \Lambda, M) = Z \odot D$ , establishing Eq. 12.  $\square$

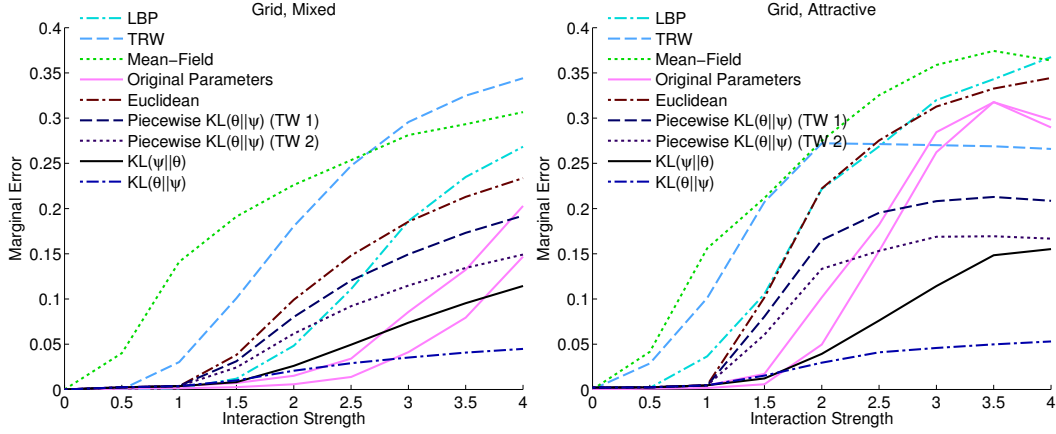

Figure 3: Accuracy on Grids, as a function of edge strength. All sampling methods use 30k samples, except sampling on the original parameters which includes a second (lower) curve with 250k samples.

**Theorem 11.** *The divergence  $D(\theta, \psi) = KL(\psi||\theta)$  has the gradient*

$$\frac{d}{d\psi} D(\theta, \psi) = \sum_x p(x; \psi) (\psi - \theta) \cdot f(x) (f(x) - \mu(\psi)).$$

*Proof.* Firstly, it can be shown that

$$D(\theta, \psi) = \sum_x p(x; \psi) (\psi - \theta) \cdot f(x) + A(\theta) - A(\psi).$$

From this, it follows that

$$\begin{aligned} \frac{d}{d\psi} D(\theta, \psi) &= \sum_x \frac{dp(x; \psi)}{d\psi} (\psi - \theta) \cdot f(x) \\ &\quad + \sum_x p(x; \psi) f(x) - \mu(\psi). \end{aligned}$$

This can be seen to be equivalent to the result by observing that the second two terms cancel, and that  $dp(x; \psi)/d\psi = p(x; \psi)(f(x) - \mu(\psi))$ .  $\square$

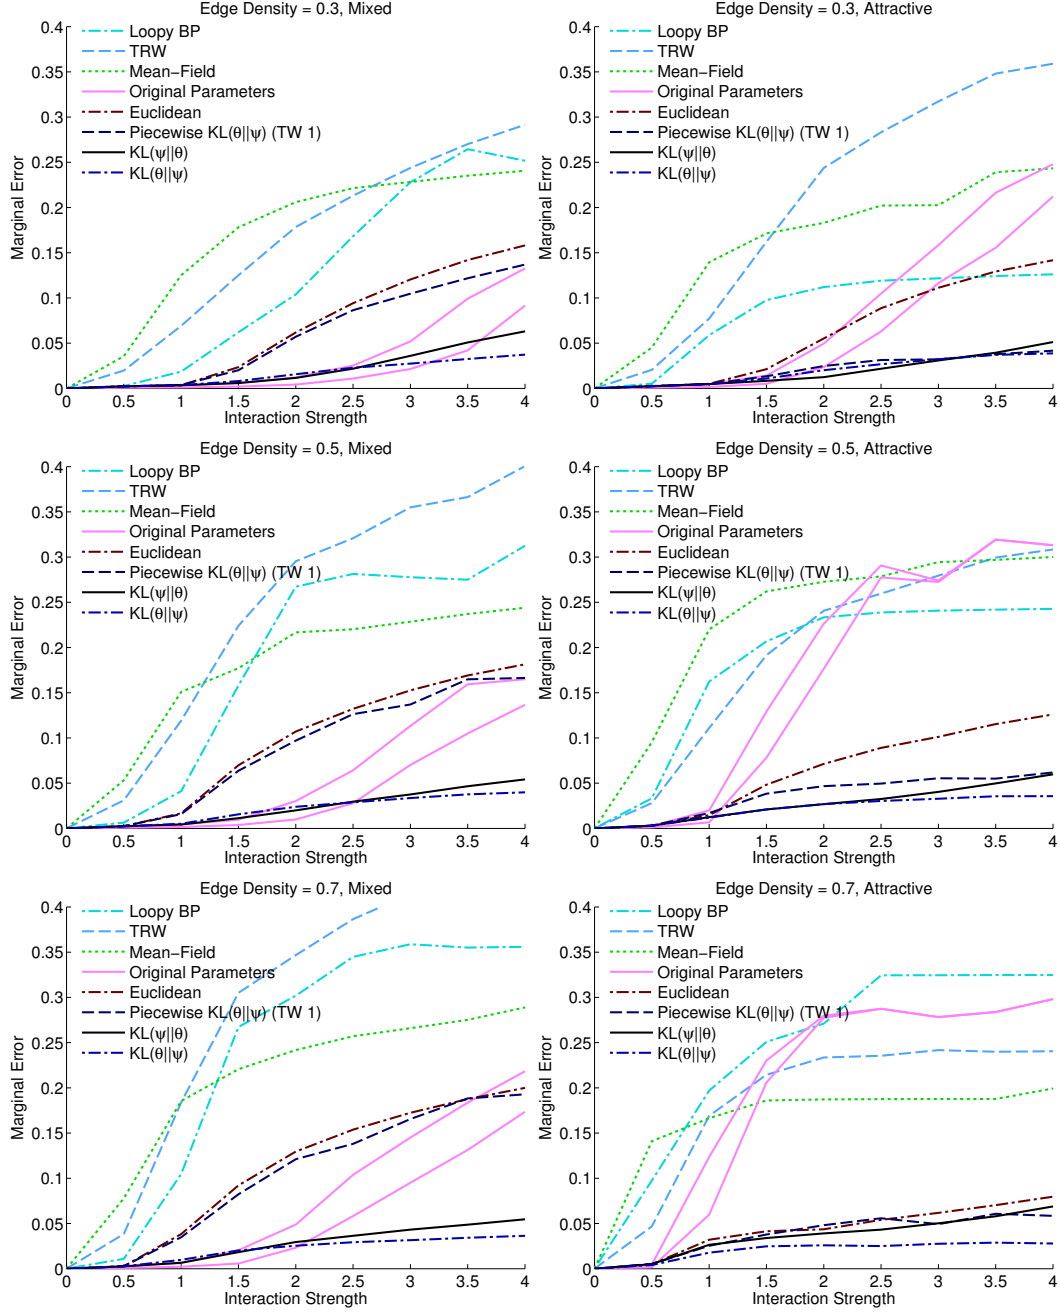

Figure 4: Accuracy on random graphs, as a function of edge strength. All sampling methods use 30k samples, except sampling on the original parameters which includes a second (lower) curve with 250k samples.

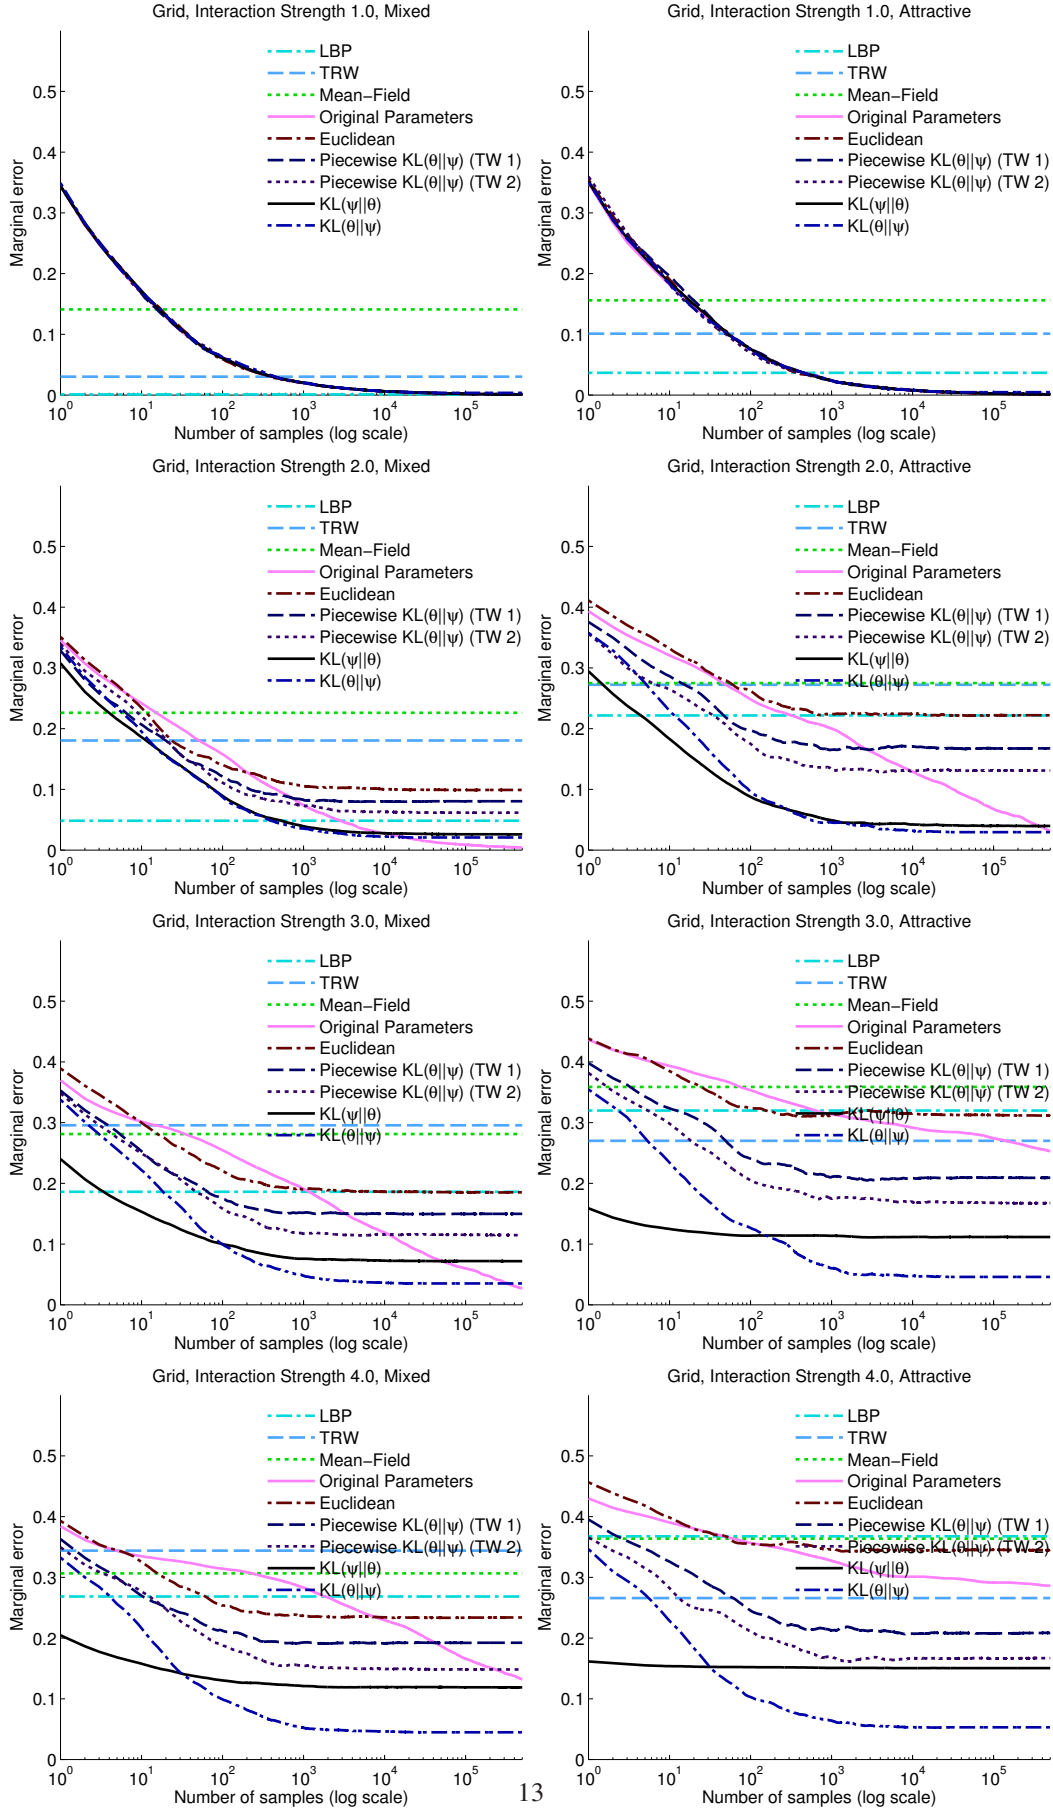

Figure 5: Accuracy on Grids as a function of time

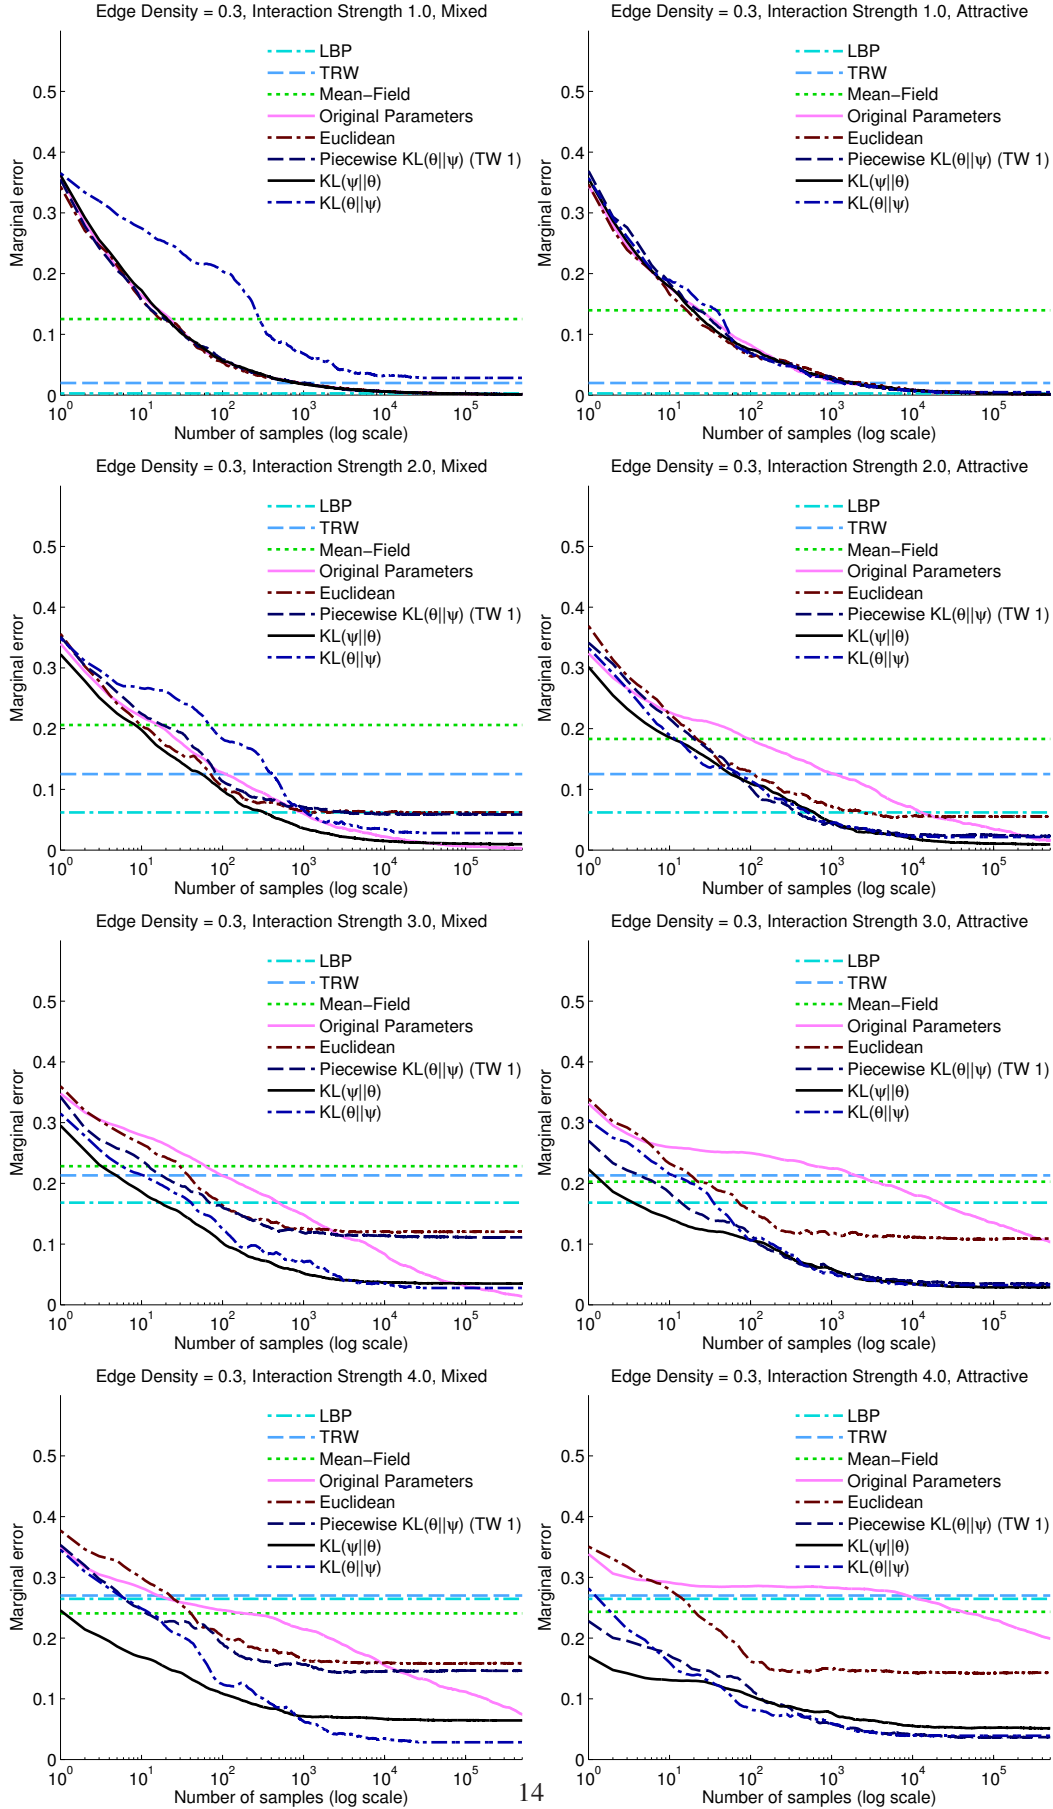

Figure 6: Accuracy on Low-Density Graphs as a function of time

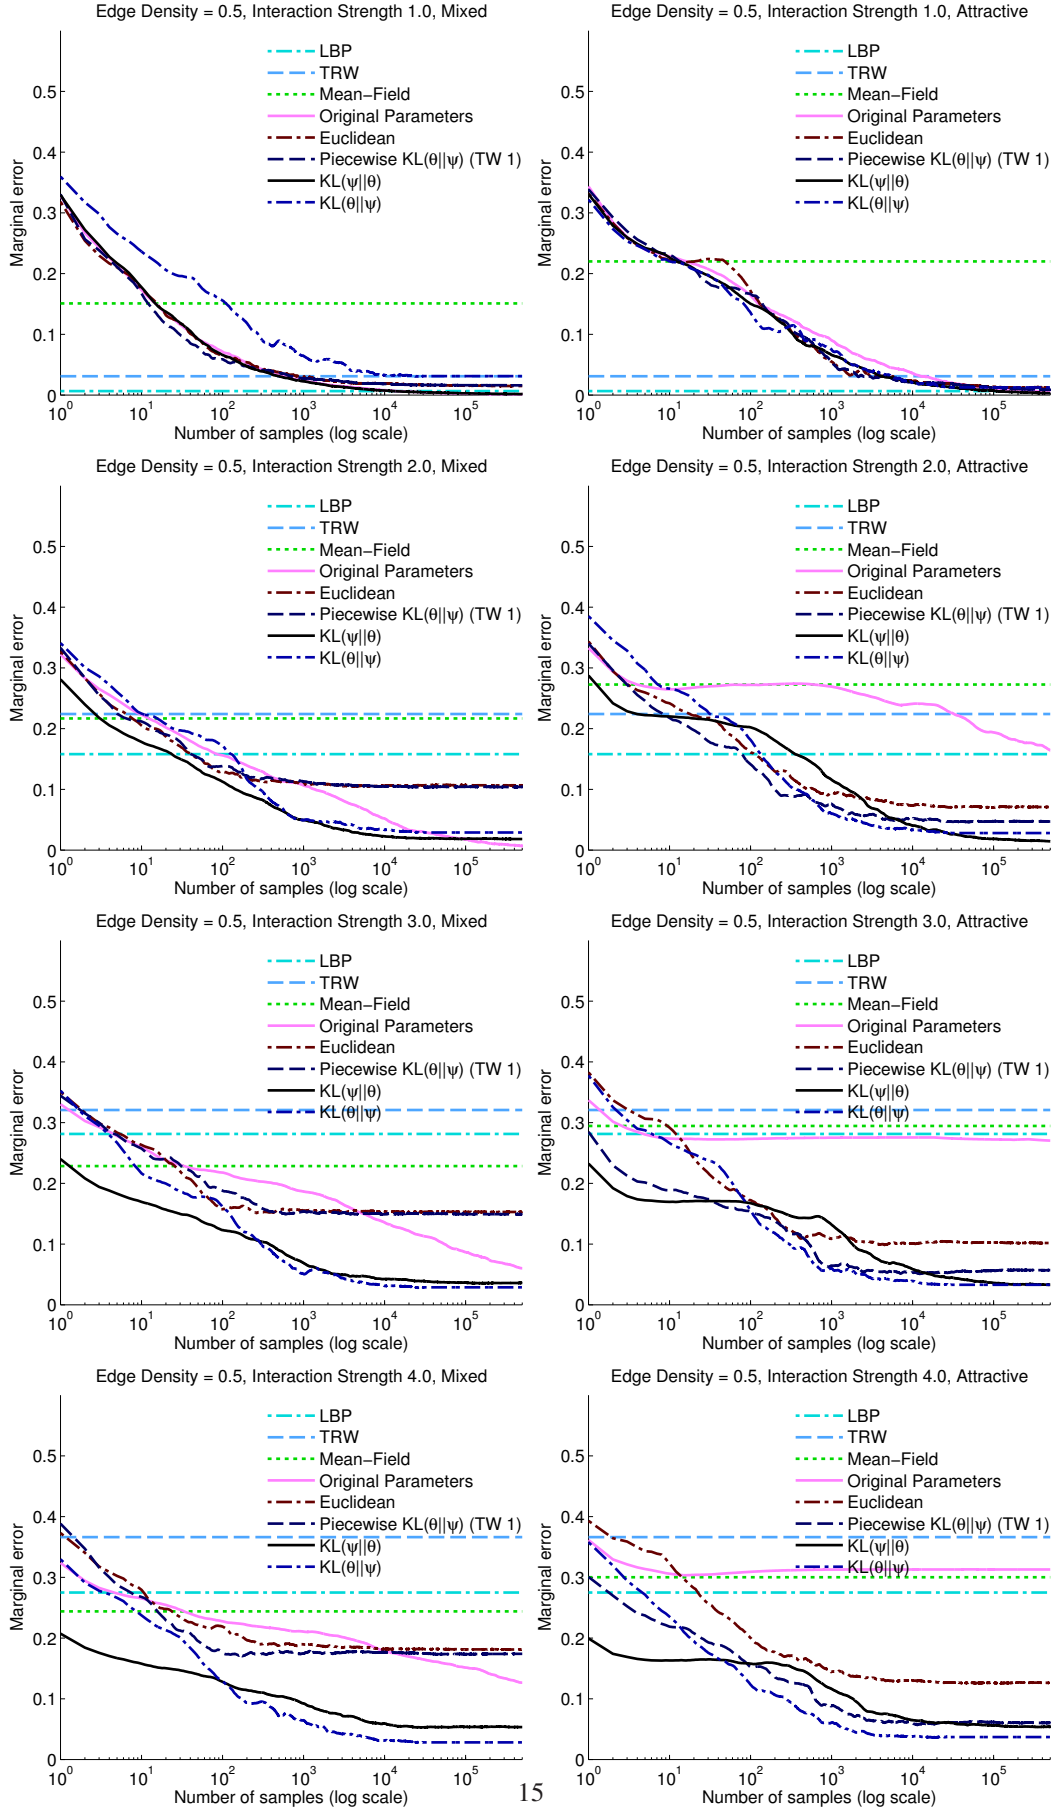

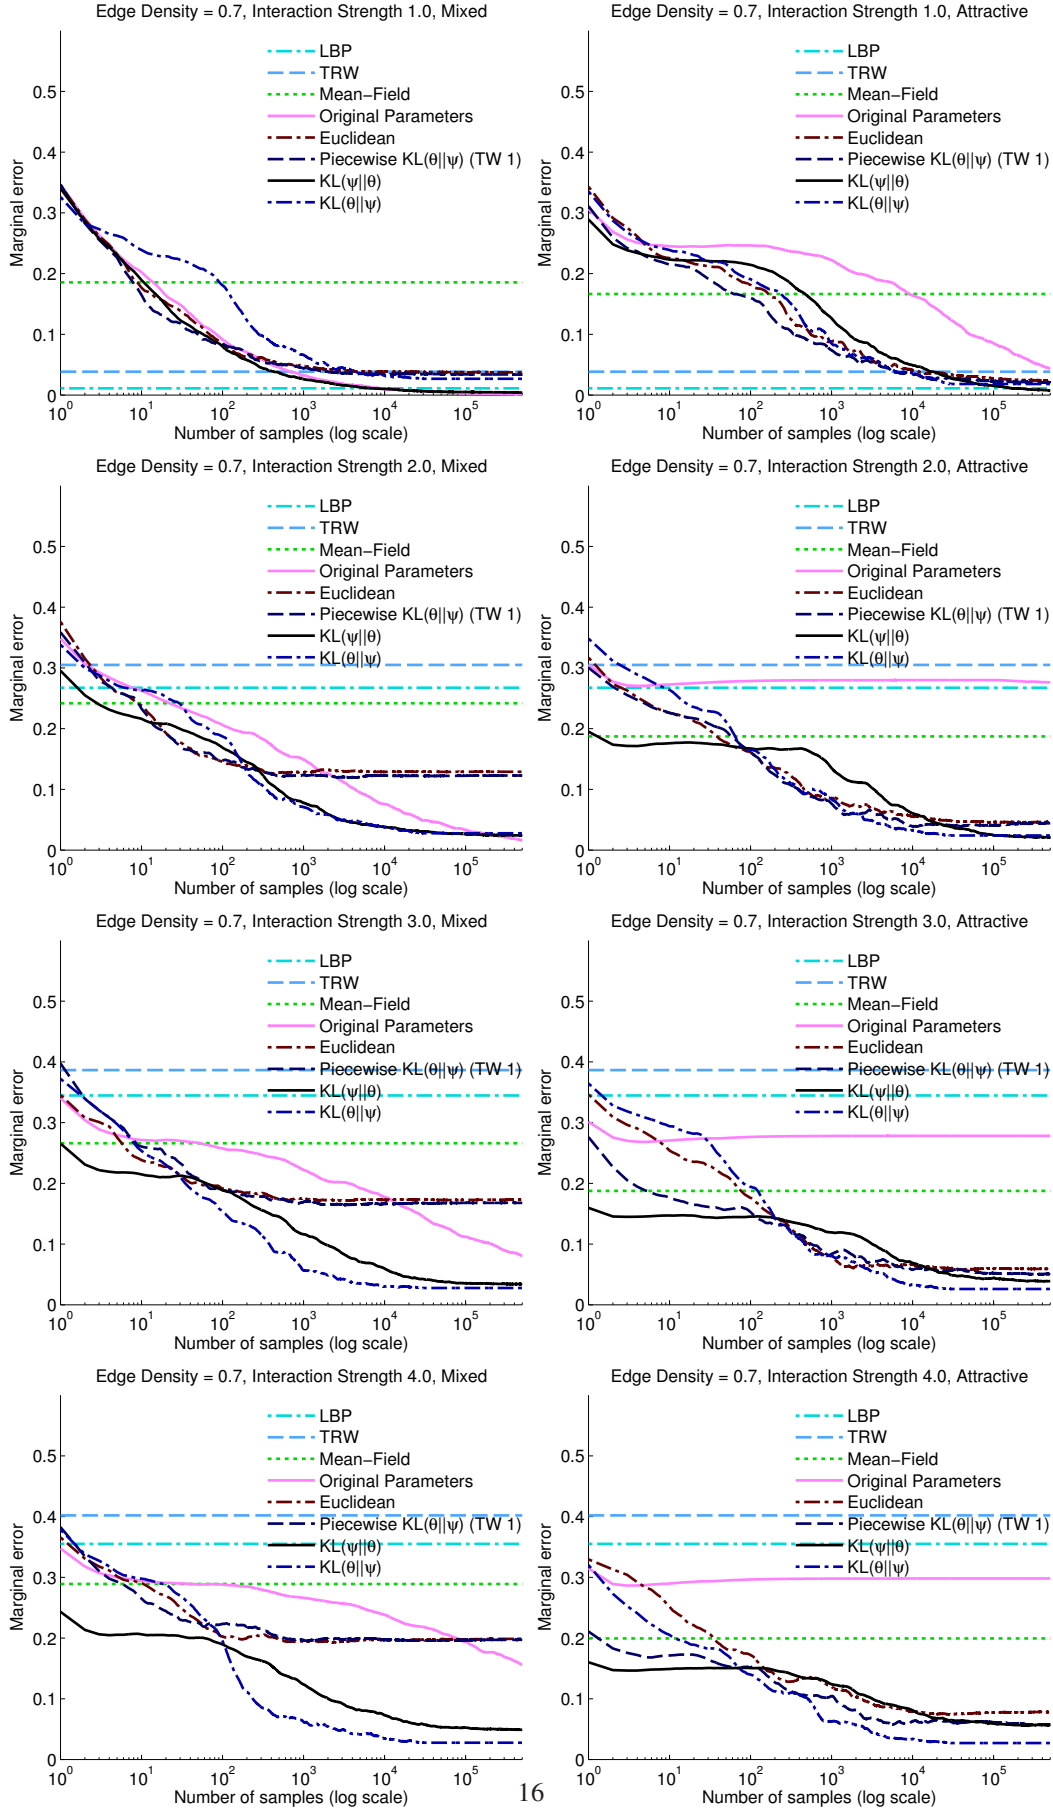

Figure 8: Accuracy on High-Density Random Graphs as a function of time
